# Supplementary material for: Epidemiology of gout in Hong Kong: a population-based study from 2006 to 2016
Source: PubMed Central journal article supplement (PMC7487938; doi:10.1186/s13075-020-02299-5), 2020-09-04

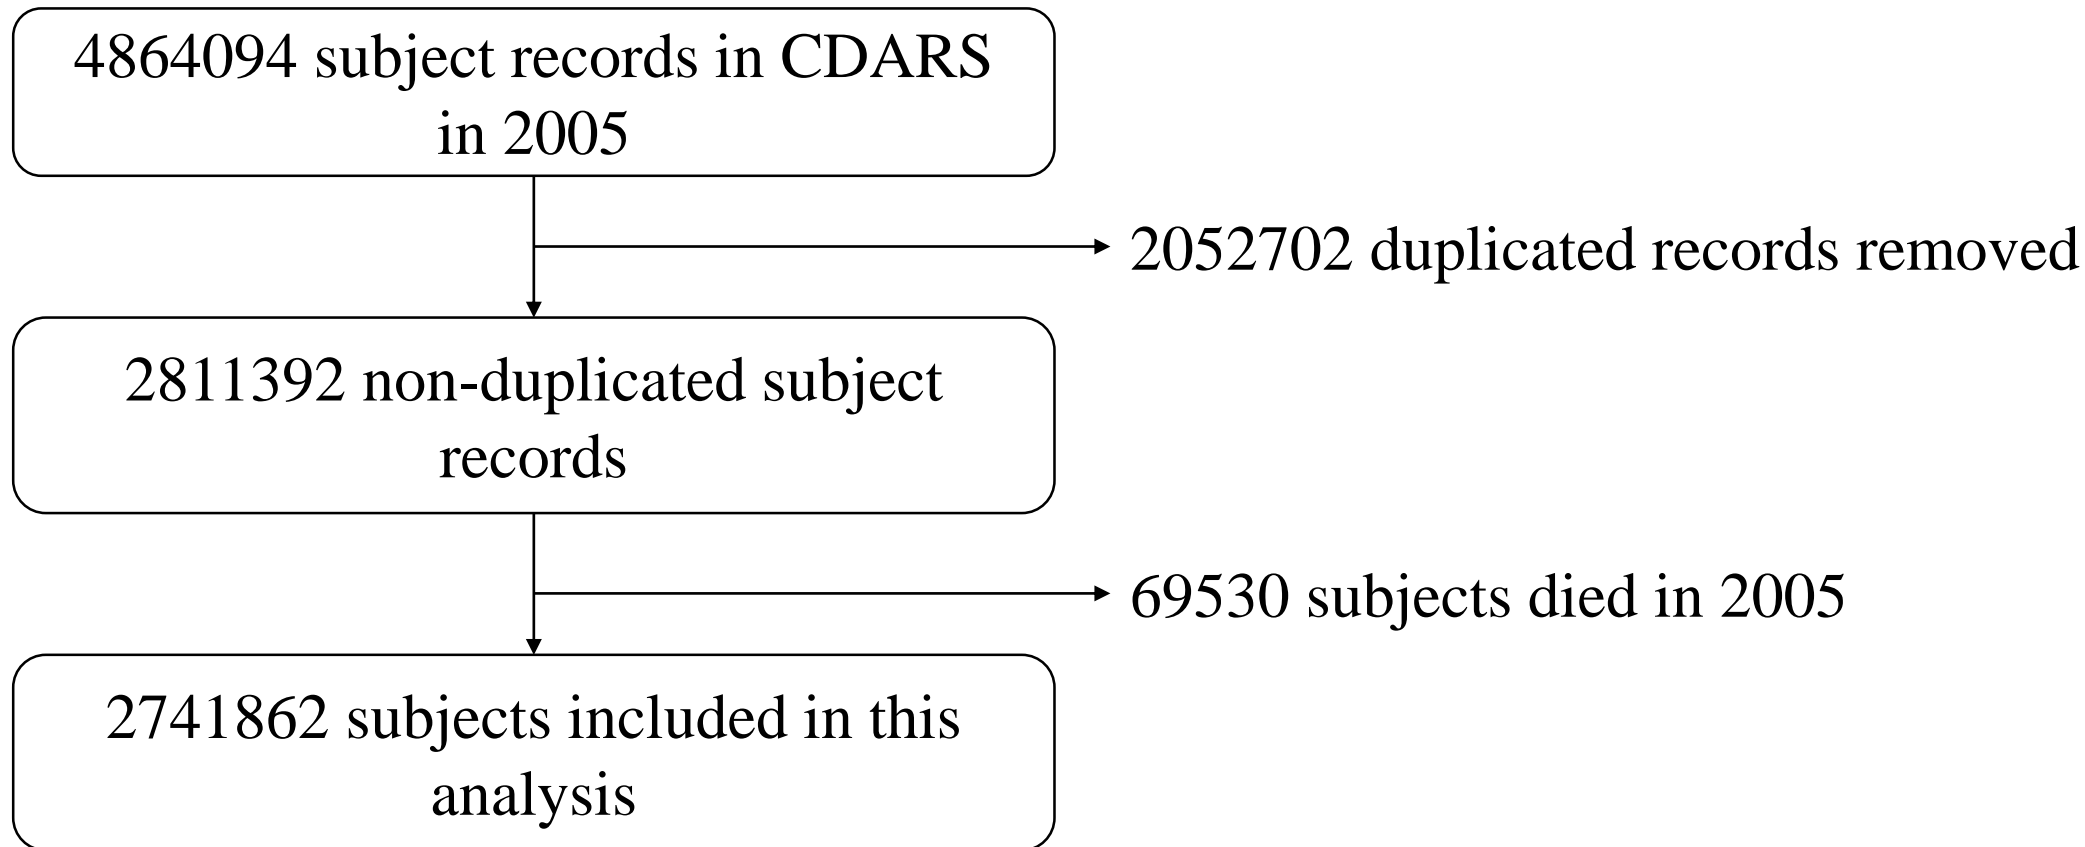

Supplement: 13075_2020_2299_MOESM1_ESM.pdf [file 13075_2020_2299_MOESM1_ESM.pdf]
